# Supplementary material for: A novel method for exploration and prediction of the bioactive target of rice bran-derived peptide (KF-8) by integrating computational methods and experiments
Source: Royal Society of Chemistry journal article supplement (doi:10.1039/d4fo02493a), 2024-01-01
Supplement: d4fo02493a1.pdf [file d4fo02493a1.pdf]

**Table S1.** KF-8-link-EGFP sequence, KF-8-link-GST sequence and their seamless cloning primers

| Sequence name                       | Seamless cloning primer       |
|-------------------------------------|-------------------------------|
| ATGAAGCACAACCGTGGTGAATTCGGTGG       | KF-8-link-F1:                 |
| AGGAGGTAGTGGTGGAGGTGGAAGTATGGTGA    | ctaccggactcagatctcgagATGAAGCA |
| GCAAGGGCGAGGAGCTGTTCACCGGGGTGGTG    | CAACCGTGGTGAATTCGG            |
| CCCATCCTGGTTCGAGCTGGACGGCGACGTAAA   | KF-8-link-F2:                 |
| CGGCCACAAGTTCAGCGTGTCCGGCGAGGGCG    | atgaattcggTGGAGGAGGTAGTGG     |
| AGGGCGATGCCACCTACGGCAAGCTGACCCTG    | TGGAGGTGGAAGTATGGTGAAG        |
| AAGTTCATCTGCACCACCGGCAAGCTGCCCCGTG  | CAAGGG                        |
| CCCTGGCCCACCCTCGTGACCACCCTGACCTAC   |                               |
| GGCGTGCAGTGCTTCAGCCGCTACCCCGACCAC   |                               |
| ATGAAGCAGCACGACTTCTTCAAGTCCGCCATG   |                               |
| CCCGAAGGCTACGTCCAGGAGCGCACCATCTTC   |                               |
| TTCAAGGACGACGGCAACTACAAGACCCGCGC    |                               |
| CGAGGTGAAGTTCGAGGGCGACACCCTGGTGA    |                               |
| ACCGCATCGAGCTGAAGGGCATCGACTTCAAG    |                               |
| GAGGACGGCAACATCCTGGGGCACAAGCTGGA    | EGFP-WR:                      |
| GTACAACACTACAACAGCCACAACGTCTATATCAT | gtaccgtcactgcagaattcCTTGTACAG |
| GGCCGACAAGCAGAAGAACGGCATCAAGGTGA    | CTCGTCCATGCC                  |
| ACTTCAAGATCCGCCACAACATCGAGGACGGC    |                               |
| AGCGTGCAGCTCGCCGACCACTACCAGCAGAA    |                               |
| CACCCCCATCGGCGACGGCCCCGTGCTGCTGCC   |                               |
| CGACAACCACTACCTGAGCACCCAGTCCGCCCT   |                               |
| GAGCAAAGACCCCAACGAGAAGCGCGATCACA    |                               |
| TGGTCTGCTGGAGTTCGTGACCGCCGCGGGA     |                               |
| TCACTCTCGGCATGGACGAGCTGTACAAG       |                               |
| ATGAAGCACAACCGTGGTGAATTCGGTGG       | KF-8-link-F1:                 |
| AGGAGGTAGTGGTGGAGGTGGAAGTATGTCCC    | ctaccggactcagatctcgagATGAAGCA |
| CTATACTAGGTTATTGGAAAATTAAGGGCCTTG   | CAACCGTGGTGAATTCGG            |

|                                                                                                                                                                                                                                                                                                                                                                                                                                                                                                                                                                                              |                                                                                            |
|----------------------------------------------------------------------------------------------------------------------------------------------------------------------------------------------------------------------------------------------------------------------------------------------------------------------------------------------------------------------------------------------------------------------------------------------------------------------------------------------------------------------------------------------------------------------------------------------|--------------------------------------------------------------------------------------------|
| <p>TGCAACCCACTCGACTTCTTTTGGGAATATCTTG<br/> AAGAAAAATATGAAGAGCATTGTATGAGCGC<br/> GATGAAGGTGATAAATGGCGAAACAAAAAGTT<br/> TGAATTGGGTTTGGAGTTCCCAATCTTCCTTAT</p>                                                                                                                                                                                                                                                                                                                                                                                                                                  | <p>KF-8-link-F2:<br/> atgaattcggTGGAGGAGGTAGTGG<br/> TGGAGGTGGAAGTATGTCCCC<br/> TATACT</p> |
| <p>TATATTGATGGTGATGTTAAATTAACACAGTCT<br/> ATGGCCATCATACGTTATATAGCTGACAAGCAC<br/> AACATGTTGGGTGGTTGTCCAAAAGAGCGTGC<br/> AGAGATTTCAATGCTTGAAGGAGCGGTTTTGGA<br/> TATTAGATACGGTGTTCGAGAATTGCATATAG<br/> TAAAGACTTTGAAACTCTCAAAGTTGATTTTCT<br/> TAGCAAGCTACCTGAAATGCTGAAAATGTTTCG<br/> AAGATCGTTTATGTCATAAAACATATTTAAATG<br/> GTGATCATGTAACCCATCCTGACTTCATGTTGT<br/> ATGACGCTCTTGATGTTGTTTTATACATGGACC<br/> CAATGTGCCTGGATGCGTTCCCAAATTAGTTT<br/> GTTTTAAAAAACGTATTGAAGCTATCCCACAAA<br/> TTGATAAGTACTTGAAATCCAGCAAGTATATAG<br/> CATGGCCTTTGCAGGGCTGGCAAGCCACGTTTG<br/> GTGGTGGCGACCATCCTCCAAA</p> | <p>GST-WR:<br/> gtaccgtcgactgcagaattcTTTTGGAGG<br/> ATGGTCGCCA</p>                         |
